# Supplementary material for: Gut microbiota phenotypes of obesity
Source: PubMed Central journal article supplement (PMC6603011; doi:10.1038/s41522-019-0091-8), 2019-07-01
Supplement: 41522_2019_91_MOESM1_ESM.pdf [file 41522_2019_91_MOESM1_ESM.pdf]

## Supplementary Figures

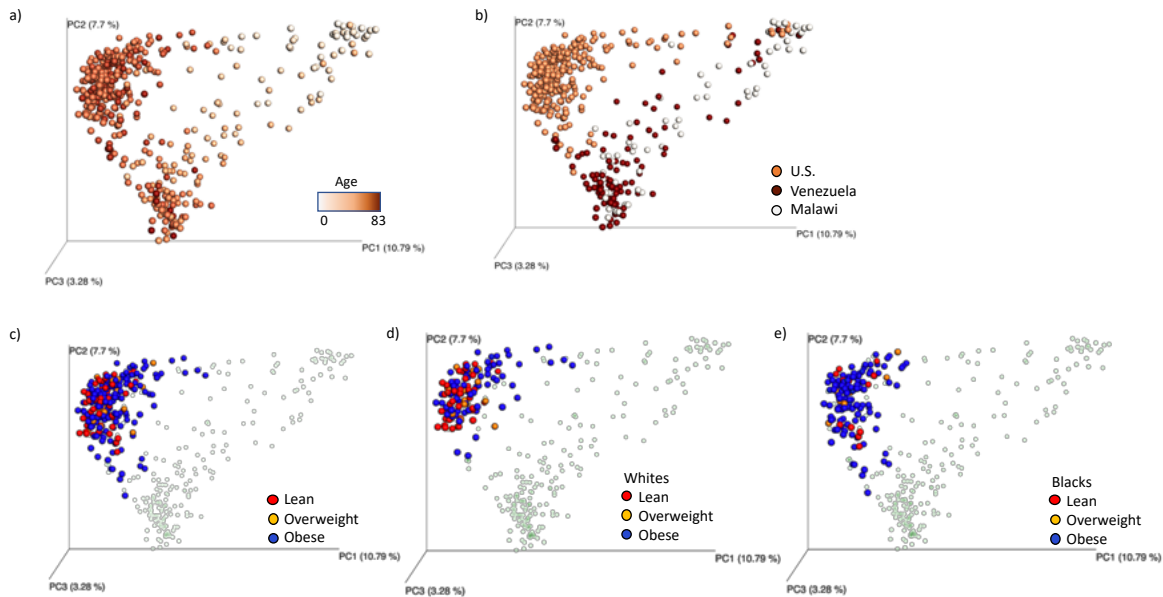

Supplementary Figure 1: Meta-analysis of 16S rRNA data from Obese Twins and GG using Unweighted UniFrac. PCoA plot with points colored a) across an age gradient, b) by country, c) by obesity status overall, d) among whites and e) among blacks.

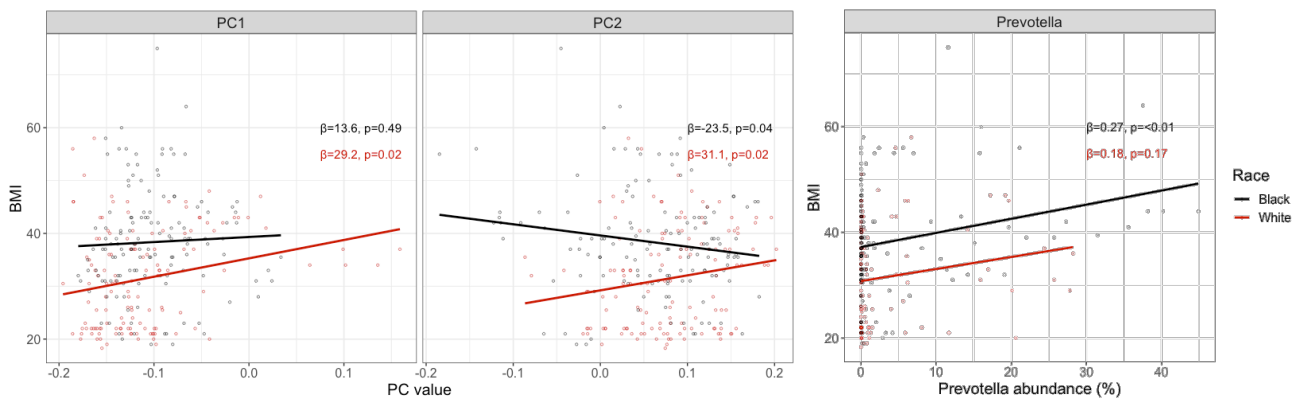

Supplementary Figure 2. a) Plots of the PC axis values against BMI in the Obese Twins study. Obese outliers were noted on these two PCoA axes, with higher prevalence of white outliers on PC1 and black outliers on PC2. Regression models support a difference in the association between BMI and these PC values by race: BMI increases significantly with PC1 for whites but not for blacks (left); BMI increases with PC2 axis for whites but decreases with PC2 for blacks (right). PC1 is inversely correlated with alpha diversity (p-value<0.01 for PD, Shannon and observed species); PC2 is inversely correlated with *Prevotella* relative abundance (p-value<0.01). However, the relationship between BMI and relative abundance of *Prevotella* (b) is much less dependent on race, although it is only significantly associated for blacks.

## Supplementary Tables

Supplementary Table 1. Characteristics of the AG cohort by race / ethnicity.

|                                        | <b>Black</b>  | <b>Hispanic</b> | <b>NHW</b>    | <b>p-value</b> |
|----------------------------------------|---------------|-----------------|---------------|----------------|
| <b>N</b>                               | <b>63</b>     | <b>188</b>      | <b>4784</b>   |                |
| Age                                    | 22 (34.9)     | 107 (56.9)      | 2219 (46.4)   | 0.003          |
| Male Sex                               | 41.44 (14.91) | 42.60 (16.25)   | 47.81 (15.65) | <0.001         |
| BMI Category                           |               |                 |               | <0.001         |
| Lean                                   | 16 (25.4)     | 94 (50.0)       | 3021 (63.1)   |                |
| Overweight                             | 21 (33.3)     | 56 (29.8)       | 1252 (26.2)   |                |
| Obese                                  | 26 (41.3)     | 38 (20.2)       | 511 (10.7)    |                |
| BMI                                    | 29.12 (6.31)  | 26.43 (5.56)    | 24.68 (4.79)  | <0.001         |
| Smoker                                 | 12 (19.0)     | 16 (8.5)        | 307 (6.4)     | <0.001         |
| <b>Diet</b>                            |               |                 |               |                |
| Vegetable frequency                    |               |                 |               | <0.001         |
| Never                                  | 0 (0.0)       | 2 (1.1)         | 14 (0.3)      |                |
| Rarely - less than once week           | 7 (11.1)      | 7 (3.7)         | 104 (2.2)     |                |
| Occasionally - 1-2 times week          | 13 (20.6)     | 34 (18.1)       | 321 (6.7)     |                |
| Regularly - 3-5 times week             | 11 (17.5)     | 65 (34.6)       | 1193 (24.9)   |                |
| Daily                                  | 12 (19.0)     | 45 (23.9)       | 1409 (29.5)   |                |
| Unknown                                | 20 (31.7)     | 35 (18.6)       | 1743 (36.4)   |                |
| Number of different types of plants    |               |                 |               | <0.001         |
| Less than 5                            | 8 (12.7)      | 25 (13.3)       | 252 (5.3)     |                |
| 6 to 10                                | 15 (23.8)     | 56 (29.8)       | 870 (18.2)    |                |
| 11 to 20                               | 11 (17.5)     | 55 (29.3)       | 1268 (26.5)   |                |
| 21 to 30                               | 4 (6.3)       | 12 (6.4)        | 694 (14.5)    |                |
| More than 30                           | 3 (4.8)       | 0 (0.0)         | 522 (10.9)    |                |
| Unknown                                | 22 (34.9)     | 40 (21.3)       | 1178 (24.6)   |                |
| High fat red meat frequency            |               |                 |               | 0.726          |
| Never                                  | 7 (11.1)      | 25 (13.3)       | 600 (12.5)    |                |
| Rarely - less than once week           | 16 (25.4)     | 57 (30.3)       | 1261 (26.4)   |                |
| Occasionally - 1-2 times week          | 13 (20.6)     | 49 (26.1)       | 827 (17.3)    |                |
| Regularly - 3-5 times week             | 6 (9.5)       | 19 (10.1)       | 298 (6.2)     |                |
| Daily                                  | 1 (1.6)       | 2 (1.1)         | 39 (0.8)      |                |
| Unknown                                | 20 (31.7)     | 36 (19.1)       | 1759 (36.8)   |                |
| <b>Markers of socioeconomic status</b> |               |                 |               |                |
| Level of education                     |               |                 |               | <0.001         |
| Did not complete high school           | 2 (3.2)       | 2 (1.1)         | 27 (0.6)      |                |
| High School or GED equivalent          | 4 (6.3)       | 15 (8.0)        | 69 (1.4)      |                |
| Some college or technical school       | 8 (12.7)      | 39 (20.7)       | 291 (6.1)     |                |
| Associate's degree                     | 3 (4.8)       | 11 (5.9)        | 110 (2.3)     |                |
| Bachelor's degree                      | 9 (14.3)      | 33 (17.6)       | 881 (18.4)    |                |
| Some graduate school or professional   | 5 (7.9)       | 17 (9.0)        | 249 (5.2)     |                |
| Graduate or Professional degree        | 12 (19.0)     | 33 (17.6)       | 1410 (29.5)   |                |
| Unknown                                | 20 (31.7)     | 38 (20.2)       | 1747 (36.5)   |                |

Supplementary Table 2. Characteristics of the EPOCH cohort ethnicity.

|                                        | <b>Hispanic</b>                            | <b>NHW</b>   | <b>p-value</b> |
|----------------------------------------|--------------------------------------------|--------------|----------------|
| <b>N</b>                               | <b>43</b>                                  | <b>59</b>    |                |
| Age                                    | 15.66 (1.05)                               | 15.83 (1.00) | 0.406          |
| Male sex                               | 24 (55.8)                                  | 33 (55.9)    | 1              |
| BMI z-score                            | 0.56 (1.11)                                | 0.44 (1.07)  | 0.564          |
| BMI category                           |                                            |              | 0.615          |
|                                        | Lean 28 (65.1)                             | 42 (71.2)    |                |
|                                        | Obese 9 (20.9)                             | 8 (13.6)     |                |
|                                        | Overweight 6 (14.0)                        | 9 (15.3)     |                |
| <b>Diet</b>                            |                                            |              |                |
| Kilocalories                           | 1615 (586)                                 | 1733 (694)   | 0.372          |
| % Carbohydrates                        | 48 (7.0)                                   | 48 (7.0)     | 0.788          |
| % Fat                                  | 38 (5.0)                                   | 38 (6.0)     | 0.983          |
| % Protein                              | 16 (2.0)                                   | 15 (2.0)     | 0.577          |
| Meat servings                          | 1.19 (0.70)                                | 1.05 (0.67)  | 0.336          |
| Vegetable servings                     | 1.80 (1.12)                                | 1.56 (1.01)  | 0.266          |
|                                        | Dark green cruciferous 0.52 (0.52)         | 0.44 (0.47)  | 0.382          |
|                                        | Dark yellow 0.29 (0.43)                    | 0.23 (0.29)  | 0.426          |
|                                        | Other vegetables 0.35 (0.33)               | 0.33 (0.36)  | 0.703          |
| Sweets                                 | 1.21 (1.08)                                | 1.54 (1.36)  | 0.209          |
| Total fiber                            | 12.97 (5.54)                               | 12.91 (5.82) | 0.964          |
|                                        | Soluble fiber 4.55 (1.88)                  | 4.51 (1.91)  | 0.922          |
|                                        | Insoluble fiber 8.30 (3.72)                | 8.28 (3.92)  | 0.977          |
| <b>Markers of socioeconomic status</b> |                                            |              |                |
| Parental education                     |                                            |              | 0.018          |
|                                        | High school, GED or less 9 (20.9)          | 5 (8.5)      |                |
|                                        | Associate degree or some college 17 (39.5) | 13 (22.0)    |                |
|                                        | Bachelor's degree 11 (25.6)                | 21 (35.6)    |                |
|                                        | Graduate degree 6 (14.0)                   | 20 (33.9)    |                |
| Household income                       |                                            |              | 0.034          |
|                                        | \$16,000-34,999 2 (4.7)                    | 2 (3.4)      |                |
|                                        | \$35,000-49,999 11 (25.6)                  | 4 (6.8)      |                |
|                                        | \$50,000-74,999 11 (25.6)                  | 10 (16.9)    |                |
|                                        | \$75,000-99,999 7 (16.3)                   | 11 (18.6)    |                |
|                                        | \$100,000 or more 12 (27.9)                | 29 (49.2)    |                |
|                                        | Unknown 0 (0.0)                            | 3 (5.1)      |                |

Supplementary Table 3. Characteristics of the Mexico City cohort.

|                           | <b>Hispanic</b>      |
|---------------------------|----------------------|
| <b>N</b>                  | <b>42</b>            |
| Age                       | 40.19 (10.14)        |
| Male Sex                  | 34 (81.0)            |
| BMI                       | 24.29                |
| BMI Category              |                      |
|                           | Lean 26 (61.9)       |
|                           | Overweight 12 (28.6) |
|                           | Obese 4 ( 9.5)       |
| Smoking status            |                      |
|                           | Unknown 42 (100.0)   |
| HIV status                |                      |
|                           | HIV- 9 (21.4)        |
|                           | HIV+ 33 (78.6)       |
| Men who have sex with men |                      |
|                           | No 6 (14.3)          |
|                           | Yes 20 (47.6)        |
|                           | Unknown 16 (38.1)    |

Supplementary Table 4. This table shows the association between individual characteristics and the overall gut microbiota composition in the 4 studies examined, using Permutational ANOVA of the unweighted and weighted UniFrac distance matrices. The first columns show the results using the rarefaction levels used throughout the analyses in the manuscript, as well as at 1000 sequences per sample, which is the minimum value used across studies (Obese Twins). The  $R^2$  values indicate how much of the variation in the gut microbiota composition is explained by each effect, with the associated p-value. The individual characteristics examined varied by study and reflect the unique characteristics of each cohort.

|                         |                                       | Varying rarefaction by study |         |                  |         | Rarefaction of 1000 |         |                  |         |
|-------------------------|---------------------------------------|------------------------------|---------|------------------|---------|---------------------|---------|------------------|---------|
|                         |                                       | Unweighted UniFrac           |         | Weighted UniFrac |         | Unweighted UniFrac  |         | Weighted UniFrac |         |
| Study                   | Effect                                | $R^2$                        | P-value | $R^2$            | P-value | $R^2$               | P-value | $R^2$            | P-value |
| Obese Twins             | Race                                  | 1.2%                         | 0.001   | 2.6%             | 0.001   | 1.2%                | 0.001   | 2.6%             | 0.001   |
|                         | <i>Rarefaction</i> Overweight / obese | 0.8%                         | 0.001   | 1.4%             | 0.008   | 0.8%                | 0.001   | 1.4%             | 0.008   |
|                         | <i>1000</i> Smoking (imputed)         | 0.6%                         | 0.001   | 1.4%             | 0.009   | 0.6%                | 0.001   | 1.4%             | 0.009   |
|                         | Age                                   | 0.7%                         | 0.001   | 1.3%             | 0.013   | 0.7%                | 0.001   | 1.3%             | 0.013   |
|                         | Race*Overweight / obese               | 0.5%                         | 0.012   | 0.4%             | 0.299   | 0.5%                | 0.012   | 0.4%             | 0.299   |
| AG                      | Race                                  | 0.1%                         | 0.001   | 0.4%             | 0.001   | 0.1%                | 0.001   | 0.3%             | 0.001   |
|                         | <i>Rarefaction</i> Overweight / obese | 0.2%                         | 0.001   | 0.1%             | 0.003   | 0.2%                | 0.001   | 0.1%             | 0.005   |
|                         | <i>10,000</i> Smoking (imputed)       | 0.1%                         | 0.001   | 0.1%             | 0.013   | 0.1%                | 0.001   | 0.1%             | 0.001   |
|                         | Sex                                   | 0.3%                         | 0.001   | 0.5%             | 0.001   | 0.2%                | 0.001   | 0.4%             | 0.001   |
|                         | Age                                   | 0.6%                         | 0.001   | 0.3%             | 0.001   | 0.5%                | 0.001   | 0.4%             | 0.001   |
| Race*Overweight / obese | 0.06%                                 | 0.001                        | 0.1%    | 0.016            | 0.05%   | 0.002               | 0.1%    | 0.006            |         |
| EPOCH                   | Ethnicity                             | 0.8%                         | 0.774   | 1.7%             | 0.123   | 0.7%                | 0.882   | 1.7%             | 0.092   |
|                         | <i>Rarefaction</i> Overweight / obese | 1.2%                         | 0.132   | 0.6%             | 0.684   | 1.1%                | 0.302   | 0.6%             | 0.713   |
|                         | <i>2537</i> Sex                       | 1.5%                         | 0.046   | 0.7%             | 0.601   | 1.5%                | 0.034   | 0.7%             | 0.599   |
|                         | Age                                   | 1.1%                         | 0.293   | 0.9%             | 0.448   | 1.1%                | 0.235   | 1.0%             | 0.369   |
|                         | Ethnicity*Overweight / obese          | 1.1%                         | 0.286   | 1.3%             | 0.203   | 1.1%                | 0.234   | 1.2%             | 0.261   |
| Mexico Cty              | Overweight / obese                    | 3.6%                         | 0.035   | 3.4%             | 0.171   | 3.5%                | 0.034   | 3.2%             | 0.194   |
|                         | <i>Rarefaction</i> HIV Status         | 3.9%                         | 0.011   | 1.4%             | 0.612   | 4.2%                | 0.01    | 1.5%             | 0.553   |
|                         | <i>1089</i> MSM                       | 2.4%                         | 0.339   | 3.5%             | 0.160   | 2.8%                | 0.156   | 3.4%             | 0.152   |
|                         | Sex                                   | 3.7%                         | 0.021   | 10.3%            | 0.006   | 3.9%                | 0.014   | 10.8%            | 0.002   |
|                         | Age                                   | 3.1%                         | 0.080   | 4.5%             | 0.088   | 2.7%                | 0.177   | 4.7%             | 0.091   |

Supplementary Table 5. This table shows the exclusion criteria from the AG cohort, as well as the racial / ethnic distribution of the remaining samples.

| <b>Inclusion</b>                           | <b>N</b> | <b>Black</b> | <b>Hispanic</b> | <b>White</b> | <b>Other</b> |
|--------------------------------------------|----------|--------------|-----------------|--------------|--------------|
| AG 100NT Samples                           | 17,876   | 124          | 399             | 15,041       | 2,312        |
| Stool                                      | 15,158   | 106          | 360             | 13,138       | 1,554        |
| Race: White, Black, Hispanic               | 13,604   | 106          | 360             | 13,138       | NA           |
| BMI within realistic range                 | 13,216   | 93           | 327             | 12,555       | NA           |
| BMI category: Normal, Overweight, or Obese | 11,860   | 88           | 292             | 11,480       | NA           |
| No dx of IBD/IBS/ASD                       | 9,482    | 78           | 258             | 9,146        | NA           |
| Country: USA or Canada                     | 7,050    | 77           | 239             | 6,734        | NA           |
| Known age>5                                | 6,853    | 73           | 227             | 6,553        | NA           |
| Rarefied at 10000 sequences / sample       | 5,035    | 63           | 188             | 4,784        | NA           |
